# Supplementary material for: Phagocytosis is a primary determinant of pulmonary clearance of clinical Klebsiella pneumoniae isolates
Source: Frontiers journal article supplement (doi:10.3389/fcimb.2023.1150658), 2023-03-28
Supplement: Data_Sheet_1.PDF [file Data_Sheet_1.PDF]

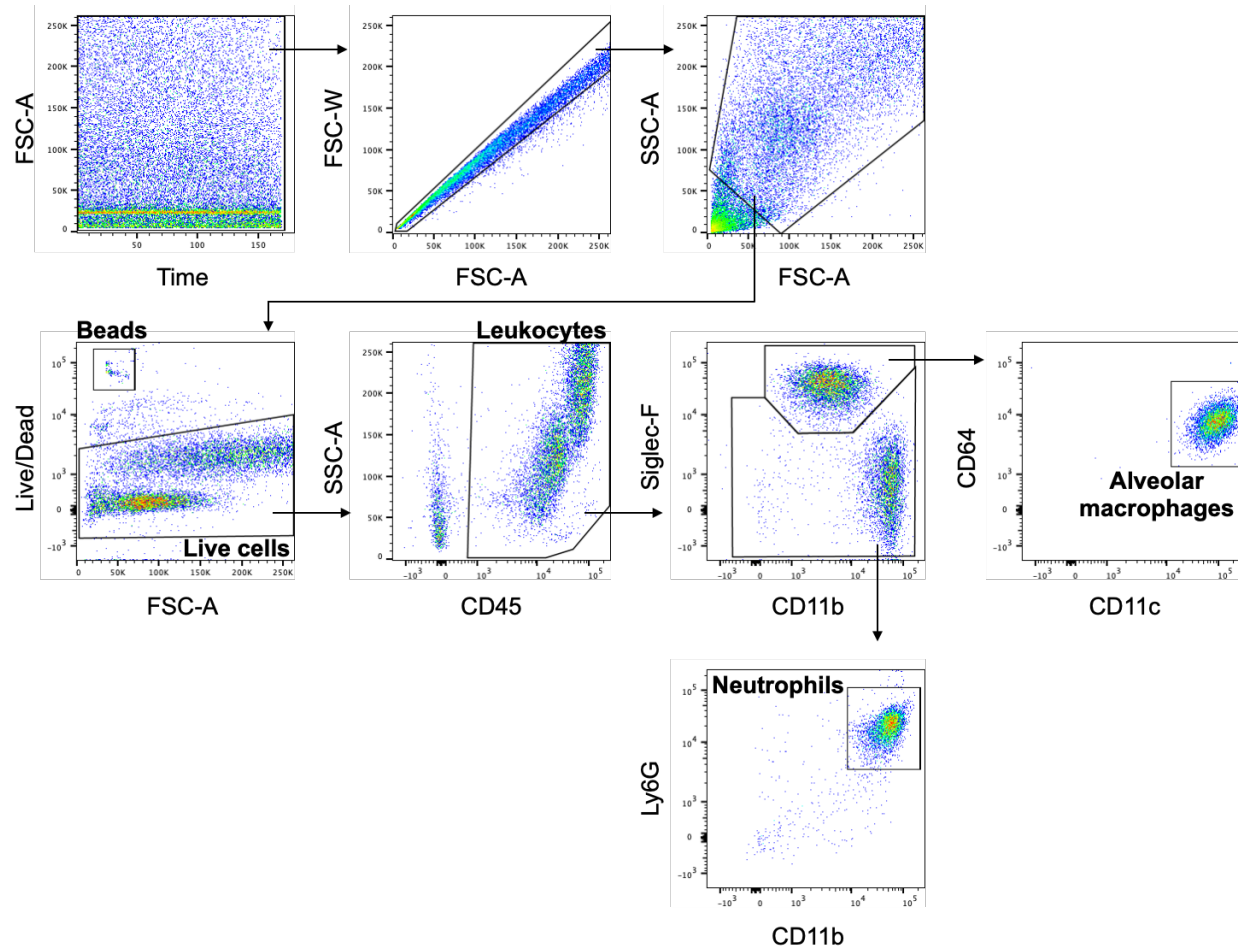

**Figure S1. Gating strategy used for the identification of alveolar macrophages and neutrophils in BAL samples by flow cytometry.** Live cells were identified using the Live/Dead Fixable Aqua Dead Cell Stain. Cells were stained for extracellular antigens using the following antibodies: CD45-AF700 (clone: 30-F11), CD11b-PE (clone: M1/70), Siglec-F-APC-Cy7 (clone: E50-2440), CD11c-PE-Cy7 (clone: HL3), CD64-BV650 (clone: X54-5/7.1), Ly6G-APC (clone: 1A8), Gating of alveolar macrophages and neutrophils was performed as described previously (32). CountBright™ Absolute Counting Beads were used to obtain absolute cell counts.
